# Supplementary material for: Temperature-dependent structure and electrochemical performance of highly nanoporous carbon from potassium biphthalate and magnesium powder via a template carbonization process
Source: Royal Society of Chemistry journal article supplement (doi:10.1039/c4ta01022a), 2014-01-01
Supplement: c4ta01022a1.pdf [file c4ta01022a1.pdf]

## Supporting Information:

### 1. Electrochemical measurements employed in present work.

#### ➤ Measurements conducted in a three-electrode system using 6 mol L<sup>-1</sup> KOH as electrolyte:

A mixture of 80 wt% the carbon sample (~ 4 mg), 15 wt% acetylene black and 5 wt% polytetrafluoroethylene (PTFE) binder was fabricated using ethanol as a solvent. Slurry of the above mixture was subsequently pressed onto nickel foam under a pressure of 20 MPa, serving as the current collector. The prepared electrode was placed in a vacuum drying oven at 120 °C for 24 h. A three electrode experimental setup taking a 6 mol L<sup>-1</sup> KOH aqueous solution as electrolyte was used in cyclic voltammetry and galvanostatic charge-discharge measurements on an electrochemical working station (CHI660D, ChenHua Instruments Co. Ltd., Shanghai). Here, the prepared electrode, platinum foil (6 cm<sup>2</sup>) and saturated calomel electrode (SCE) were used as the working, counter and reference electrodes, respectively.

Specific capacitances derived from galvanostatic tests can be calculated from the equation:

$$C = \frac{I\Delta t}{m\Delta V}$$

where  $C$  (F g<sup>-1</sup>) is the specific capacitance;  $I$  (A) is the discharge current;  $\Delta t$  (s) is the discharge time;  $\Delta V$  (V) is the voltage window; and  $m$  (g) is the mass of active materials loaded in working electrode.

Specific capacitances derived from cyclic voltammetry tests can be calculated from the equation:

$$C = \frac{1}{mv(V_b - V_a)} \int_{V_a}^{V_b} IdV$$

where  $C$  (F g<sup>-1</sup>) is the specific capacitance;  $m$  (g) is the mass of active materials loaded in working electrode;  $v$  (V s<sup>-1</sup>) is the scan rate;  $I$  (A) is the discharge current;  $V_b$  and  $V_a$  (V) are high and low voltage limit of the CV tests.

➤ **Measurements conducted in a two-electrode system using [EMIm]BF<sub>4</sub>/AN as electrolyte:**

In a two-electrode cell, [EMIm]BF<sub>4</sub> and acetonitrile (AN) (weight ratio of 1:1) was adopted as electrolyte. A glassy paper separator was sandwiched between two electrodes, and each electrode contains a mixture of 80 wt% the carbon sample (~ 2 mg), 15 wt% acetylene black and 5 wt% polytetrafluoroethylene (PTFE) binder. Nickel foam serves as the current collector. The assembly of the test cell was done in a glove box filled with Ar.

Specific capacitances derived from galvanostatic tests can be calculated from the equation:

$$C = \frac{4I\Delta t}{m\Delta V}$$

where  $C$  (F g<sup>-1</sup>) is the specific capacitance;  $I$  (A) is the discharge current;  $\Delta t$  (s) is the discharge time;  $\Delta V$  (V) is the voltage window; and  $m$  (g) is the total mass of two electrodes.

Specific capacitances derived from cyclic voltammetry tests can be calculated from the equation:

$$C = \frac{2}{mv(V_b - V_a)} \int_{V_a}^{V_b} IdV$$

where  $C$  (F g<sup>-1</sup>) is the specific capacitance;  $m$  (g) is the mass of active materials loaded in working electrode;  $v$  (V s<sup>-1</sup>) is the scan rate;  $I$  (A) is the discharge current;  $V_b$  and  $V_a$  (V) are high and low voltage limit of the CV tests.

Specific energy density ( $E$ ) and specific power density ( $P$ ) derived from galvanostatic tests can be calculated from the equations:

$$E = \frac{1}{8} C \Delta V^2$$
$$P = \frac{E}{\Delta t}$$

where  $E$  (Wh kg<sup>-1</sup>) is the average energy density;  $C$  (F g<sup>-1</sup>) is the specific capacitance;  $\Delta V$  (V) is the voltage window;  $P$  (W kg<sup>-1</sup>) is the average power density and  $\Delta t$  (s) is the discharge time.

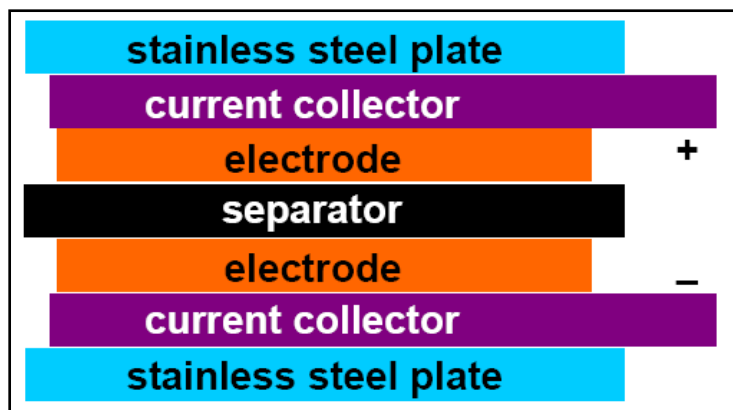

**Fig. S1.** Schematic illustration of a supercapacitor cell.

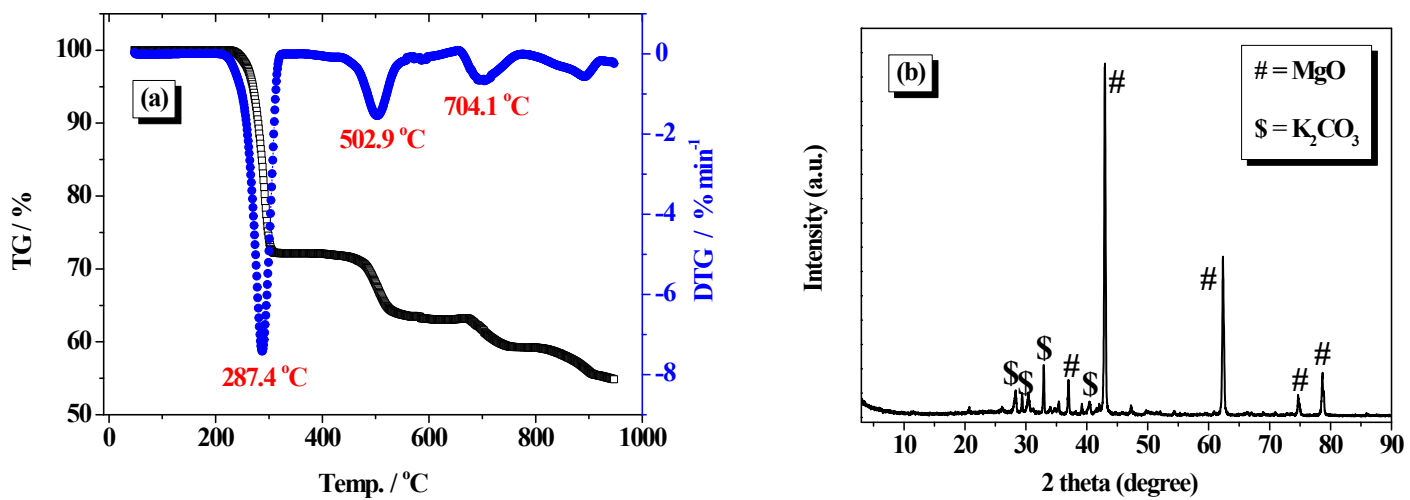

**Fig. S2.** (a) TG-DTG curve of potassium biphthalate and magnesium powder (the mass ratio of 3:1) and (b) XRD pattern of the **carbon-3:1-800** sample before washing with HCl solution.

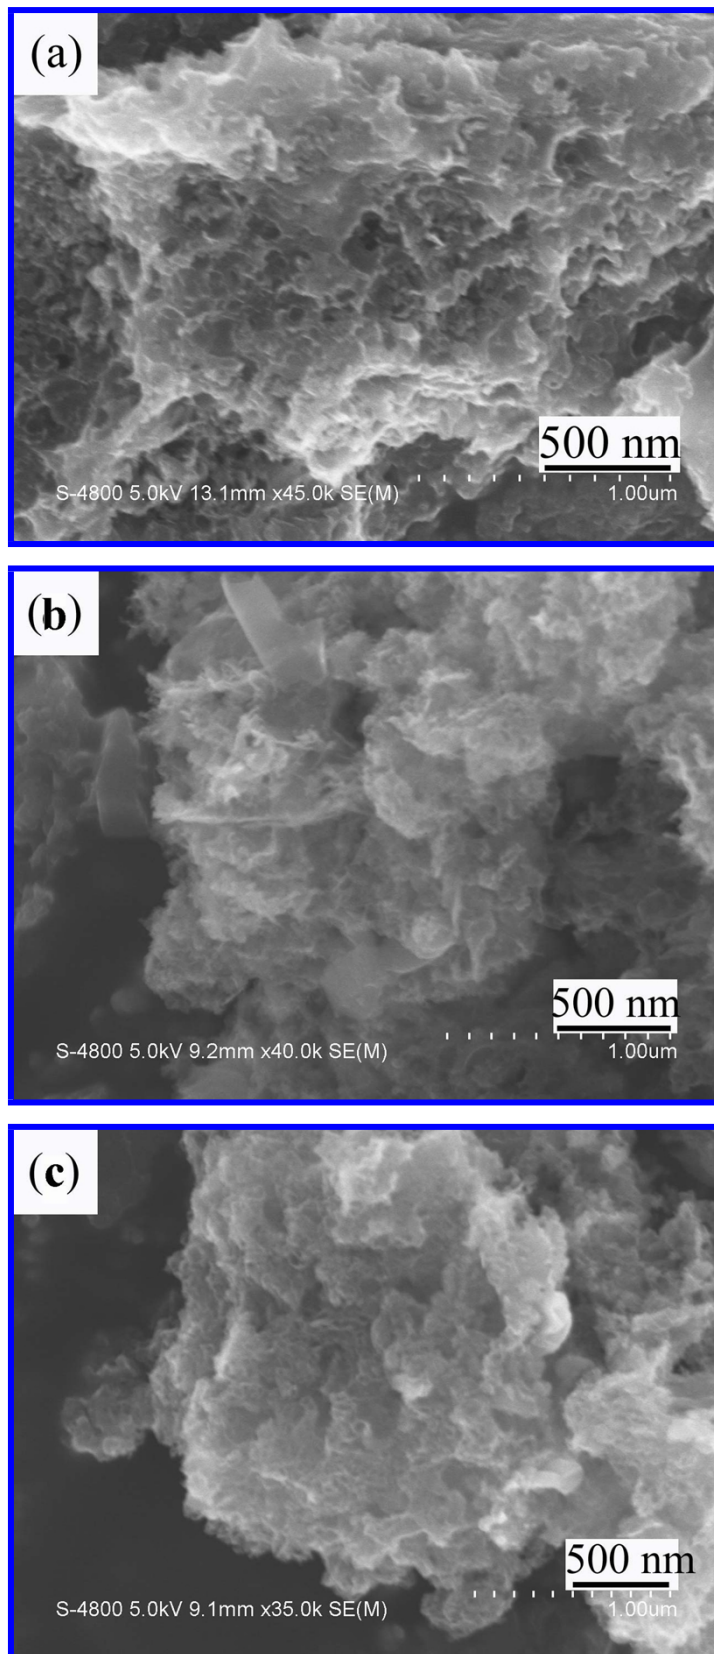

**Fig. S3** FESEM images: (a) **carbon-3:1-800**; (b) **carbon-3:1-1000**; (c) **carbon-3:1-1200**.

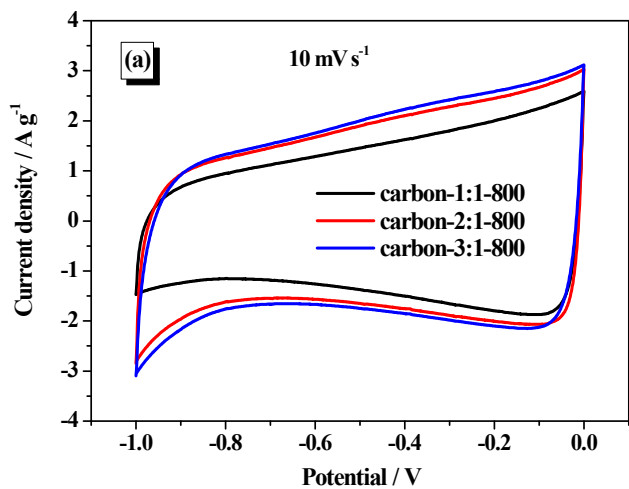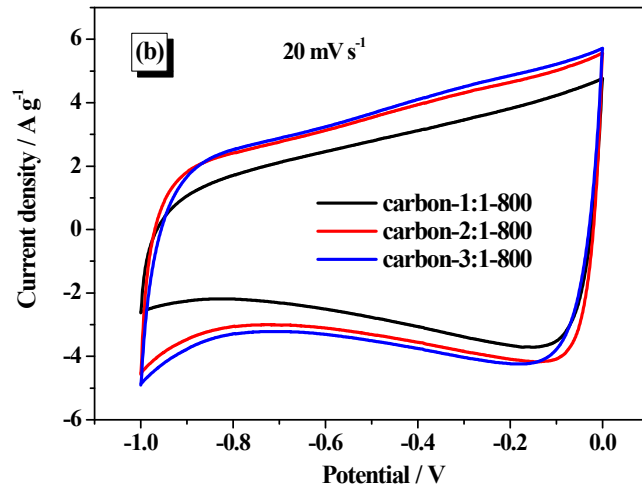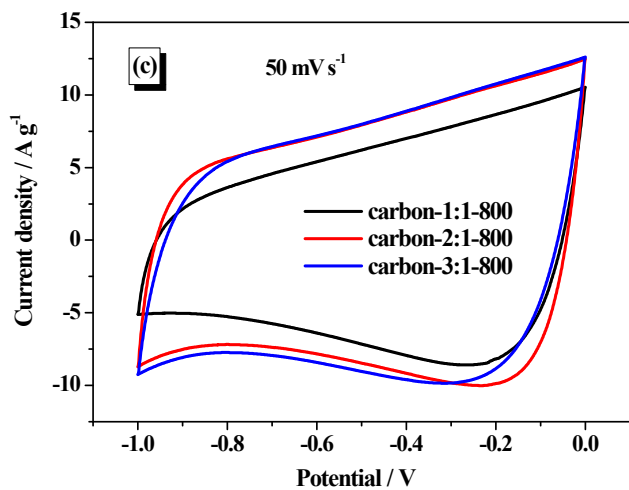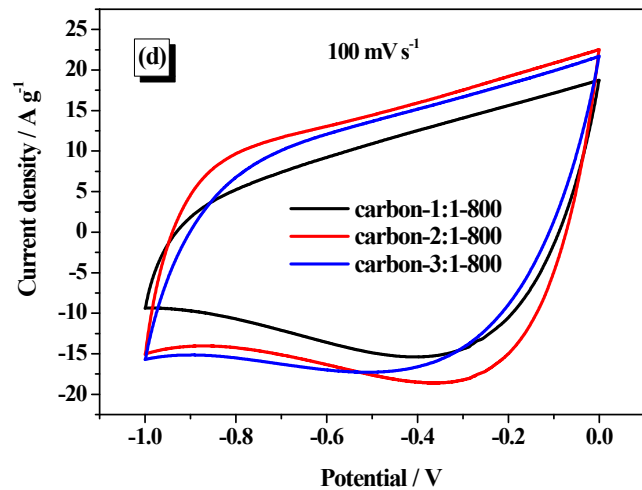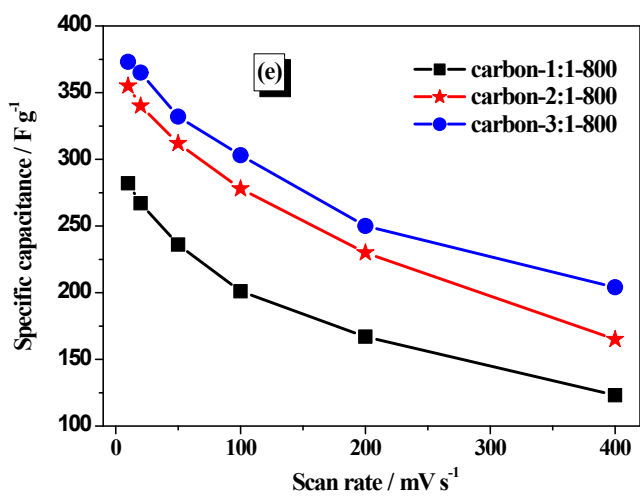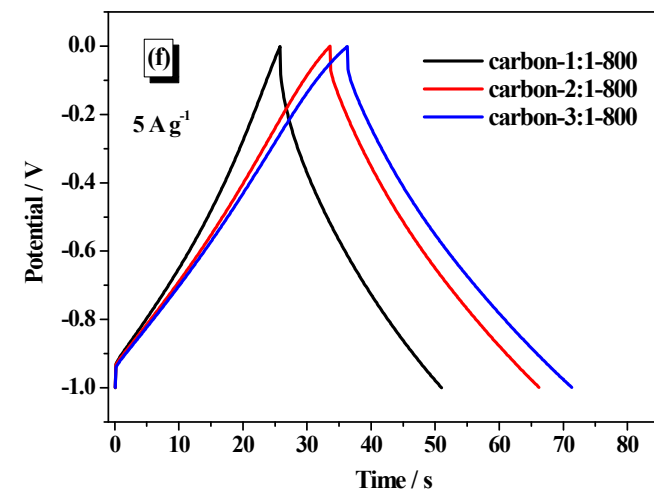

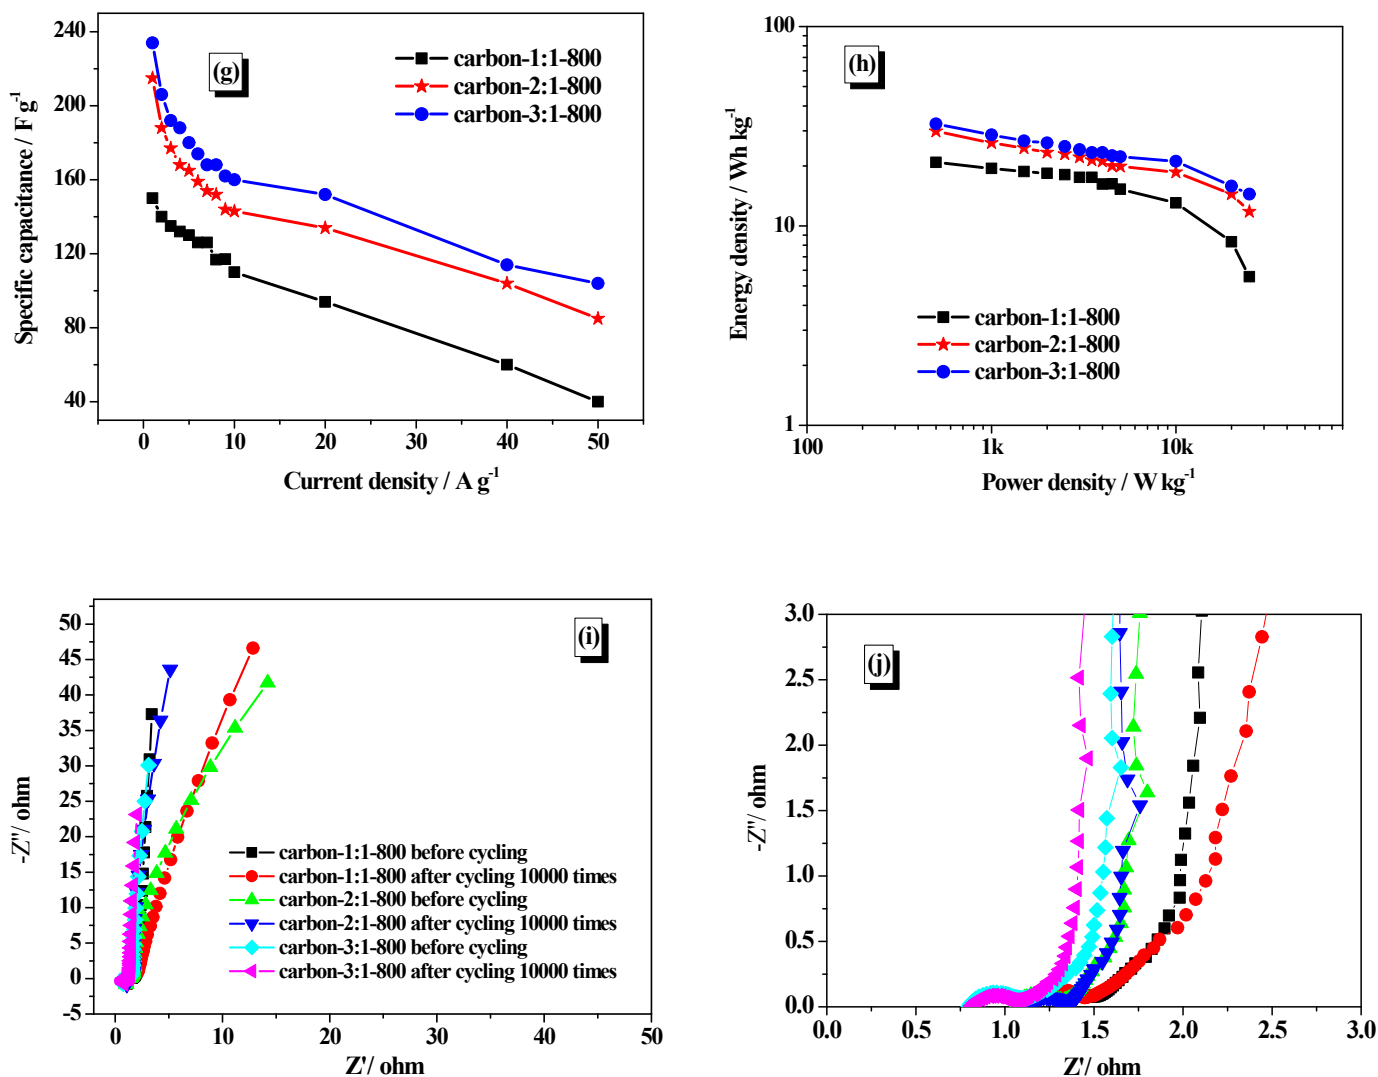

**Fig. S4.** Carbon-1:1/2:1/3:1-800 samples measured in a three-electrode system using 6 mol L<sup>-1</sup> KOH as electrolyte: (a) CV curves at a scan rate of 10 mV s<sup>-1</sup>; (b) CV curves at a scan rate of 20 mV s<sup>-1</sup>; (c) CV curves at a scan rate of 50 mV s<sup>-1</sup>; (d) CV curves at a scan rate of 100 mV s<sup>-1</sup>; (e) specific capacitances calculated from CV curves; (f) GCD curves at a current density of 5 A g<sup>-1</sup>; (g) specific capacitances calculated from GCD curves; (h) Ragone plots; (i) Nyquist plots before/after 10000 cycles as well as the enlarged ones (j).

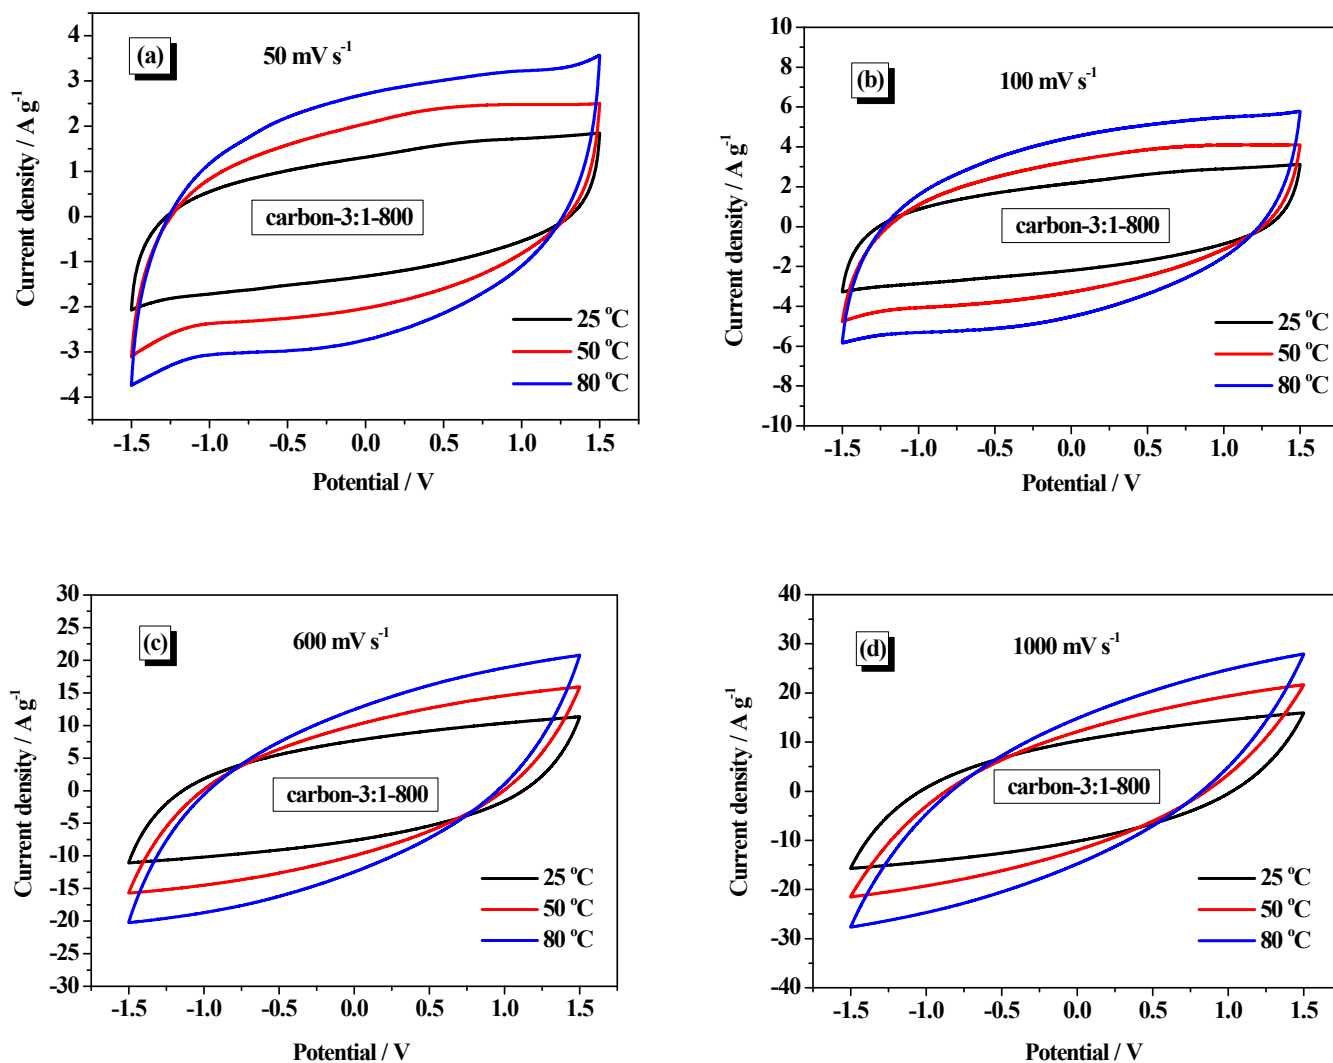

**Fig. S5. Carbon-3:1-800** sample measured in a two-electrode system using [EMIm]BF<sub>4</sub>/AN as electrolyte at the operation temperatures of 25/50/80 °C: CV curves at different scan rates.
